# Supplementary material for: Transmission and Persistence of Infant Gut-Associated Bifidobacteria
Source: MDPI journal article supplement (doi:10.3390/microorganisms12050879), 2024-04-27
Supplement: s1 [file s1]

## **Supplementary Materials:**

### **Materials and methods for phylogenetic inference**

Genomic assemblies were retrieved from the NCBI (<https://www.ncbi.nlm.nih.gov/>) and IMG (<https://img.jgi.doe.gov/cgi-bin/m/main.cgi>) databases using the GenBank or IMG Genome ID accession numbers listed in Supplementary Table S1. Phylogenetic analysis was performed using the up-to-date bacterial core gene (UBCG2) pipeline, which infers a maximum-likelihood phylogeny using the concatenated sequences of 81 single-copy core genes [103]. UBCG2 utilizes the external programs Prodigal v2.6.3, hmmsearch v3.1, and MAFFT v7.313 in the pipeline [104–106]. Arguments were used to invoke FastTree v2.1.10 for phylogenetic reconstruction and the GTRcat model [107]. *Gardnerella vaginalis* ATCC14018 was used as the outgroup. Phylogenetic trees were visualized and formatted for clarity using the ape, ggtree, glue, ggplot2, and ggtext packages in R [108–112].
