# Supplementary material for: Transmission and Persistence of Infant Gut-Associated Bifidobacteria
Source: MDPI journal article supplement (doi:10.3390/microorganisms12050879), 2024-04-27
Supplement: s1 [file s1]

| Species designation                                             | Strain Name | IMG Genome ID or GenBank accession | Isolation source         | Additional information                      |
|-----------------------------------------------------------------|-------------|------------------------------------|--------------------------|---------------------------------------------|
| <i>Bifidobacterium adolescentis</i>                             | ATCC15703   | GCA_000010425.1                    | Human feces              |                                             |
| <i>Bifidobacterium bifidum</i>                                  | ATCC29521   | GCA_001025135.1                    | Human infant feces       | JCM 1255; DSM 20456                         |
| <i>Bifidobacterium bifidum</i>                                  | PRL2010     | GCA_000165905.1                    | Human infant feces       |                                             |
| <i>Bifidobacterium breve</i>                                    | BR3         | GCA_001281425.1                    | Human infant feces       |                                             |
| <i>Bifidobacterium breve</i>                                    | DSM20213    | GCA_001025175.1                    | Human infant feces       | JCM 1192; LMG 13208; ATCC 15700; NCTC 11815 |
| <i>Bifidobacterium dentium</i>                                  | ATCC27678   | GCA_000172135.1                    | Human feces              |                                             |
| <i>Bifidobacterium longum</i> subsp. <i>infantis</i>            | ATCC15697   | 643348516                          | Human infant feces       | JCM 1222; DSM 20088                         |
| <i>Bifidobacterium longum</i> subsp. <i>infantis</i>            | UCD298      | 2503754025                         | Human infant feces       | ATCC 25962; JCM 1210; DSM 20223             |
| <i>Bifidobacterium longum</i> subsp. <i>infantis</i>            | UCD299      | 2503754026                         | Human infant feces       | ATCC 17930; JCM 1260; DSM 20218             |
| <i>Bifidobacterium longum</i> subsp. <i>infantis</i>            | UCD300      | 2503754027                         | Human infant feces       | ATCC 15702; JCM 1272; DSM 20090             |
| <i>Bifidobacterium catenulatum</i> subsp. <i>kashiwanohense</i> | JCM15439    | GCA_001042615.1                    | Human infant feces       | DSM 21854                                   |
| <i>Bifidobacterium longum</i> subsp. <i>longum</i>              | JCM1217     | GCA_000196555.1                    | Human feces              |                                             |
| <i>Bifidobacterium longum</i> subsp. <i>longum</i>              | JCM7052     | GCA_015100215.1                    | Human feces              |                                             |
| <i>Bifidobacterium longum</i> subsp. <i>longum</i>              | KCTC3128    | GCA_017132775.1                    | Human feces              |                                             |
| <i>Bifidobacterium pseudocatenulatum</i>                        | DSM20438    | GCA_001025215.1                    | Human infant feces       | ATCC 27919; JCM 1200; LMG 10505             |
| <i>Bifidobacterium longum</i> subsp. <i>suis</i>                | JCM19995    | GCA_017132755.1                    | Piglet feces             | DSM 28597                                   |
| <i>Bifidobacterium longum</i> subsp. <i>suis</i>                | DSM20211    | GCA_000771285.1                    | Pig feces                |                                             |
| <i>Gardnerella vaginalis</i>                                    | ATCC14018   | GCA_001042655.1                    | Human vaginal secretions | NCTC 10287; JCM 11026                       |

**Supplementary Table S1: *Bifidobacterium* strains and accession numbers used to construct the phylogeny.**
